# Supplementary material for: Photochemical Degradation of the UV Filter Octyl Methoxy Cinnamate Probed via Laser-Interfaced Mass Spectrometry
Source: MDPI journal article supplement (doi:10.3390/molecules27248796), 2022-12-12

## Photochemical Degradation of the Sunscreen Octyl methoxycinnamate Probed via Laser Interfaced Mass Spectrometry

Natalie G. K. Wong, Maria Sereli, Cate S. Anstöter and Caroline E. H. Dessent\*

Department of Chemistry, University of York, Heslington, YO10 5DD, U. K.

\* E-mail: [caroline.dessent@york.ac.uk](mailto:caroline.dessent@york.ac.uk)

### Content

S1: Raw ion intensity mass spectra of the thermal fragments of  $[\text{OMC}+\text{H}]^+$

S2: Photofragment production spectra of the minor photofragments produced by  $[\text{OMC}+\text{H}]^+$  obtained via laser-interfaced mass spectrometry

S1: Raw ion intensity mass spectra of the thermal fragments of [OMC+H]<sup>+</sup>

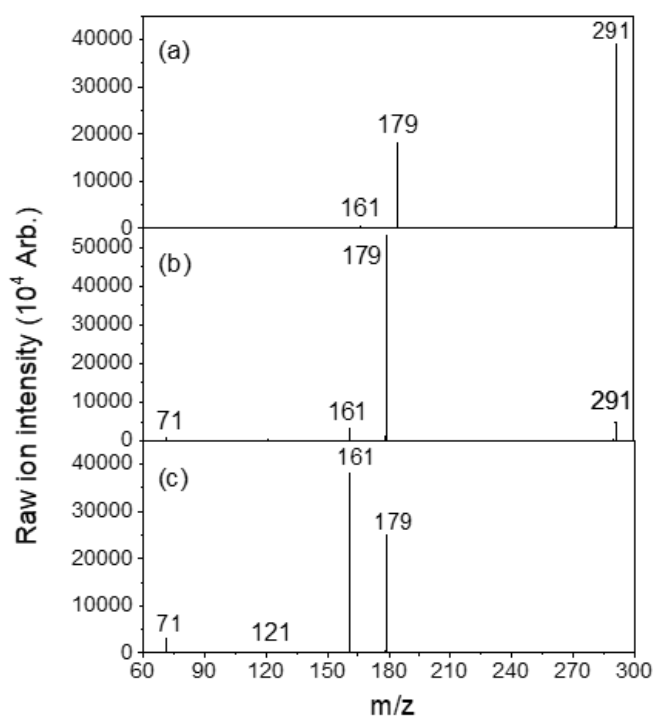

**Figure S1:** Raw ion intensity mass spectra of the thermal fragments of [OMC+H]<sup>+</sup> at 0 % (a), 8 % (b) and 22 % (c) HCD energy.

S2: Photofragment production spectra of the minor photofragments produced by [OMC+H]<sup>+</sup> obtained via laser-interfaced mass spectrometry

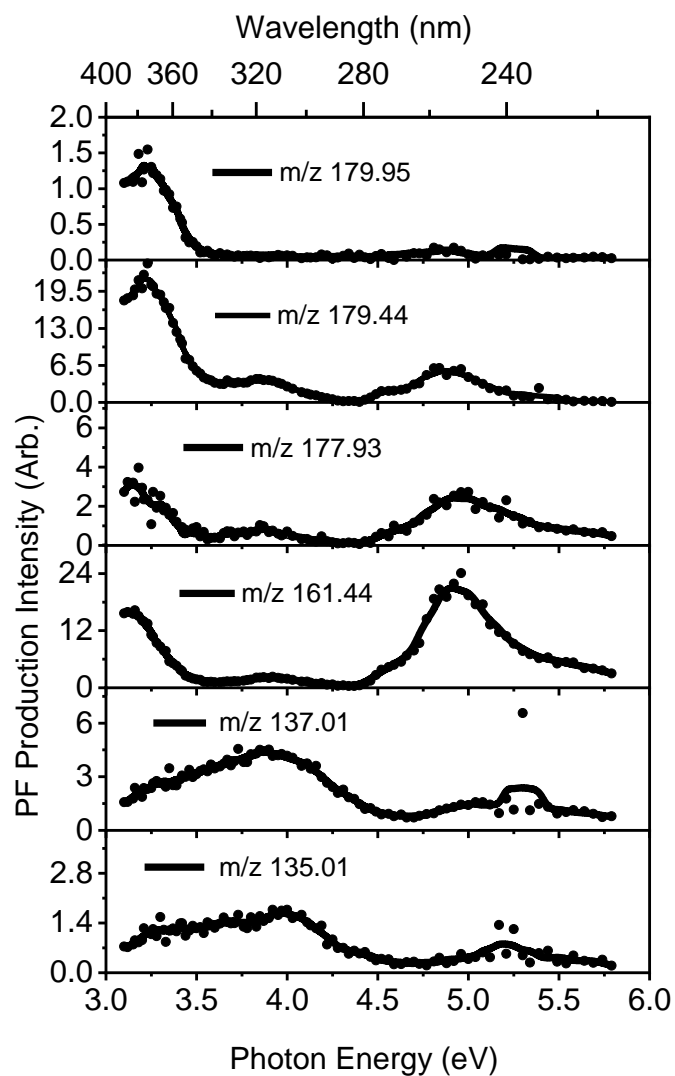

**Figure S2:** Photofragment production spectra of the minor fragments ( $m/z$  179.95, 179.44, 177.93, 161.44, 137.01 and 135.01) of gas-phase [OMC+H]<sup>+</sup>. The solid line is a five-point adjacent average of the data points.

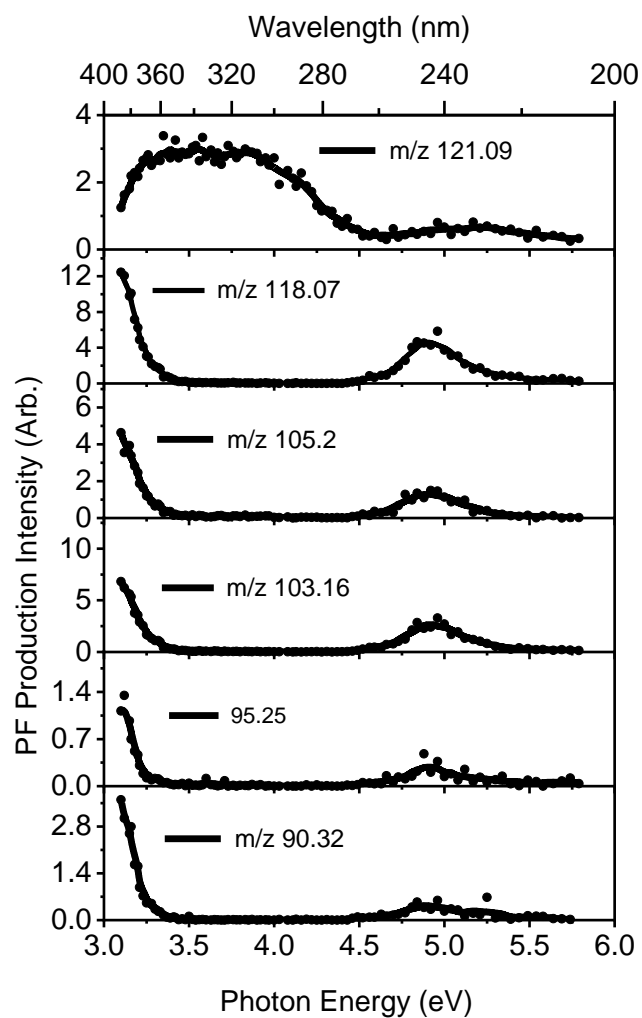

**Figure S3:** Photofragment production spectra of the minor fragments ( $m/z$  121.09, 118.07, 105.2, 103.16, 95.25 and 90.32) of gas-phase  $[[\text{OMC}+\text{H}]^+$ . The solid line is a five-point adjacent average of the data points.

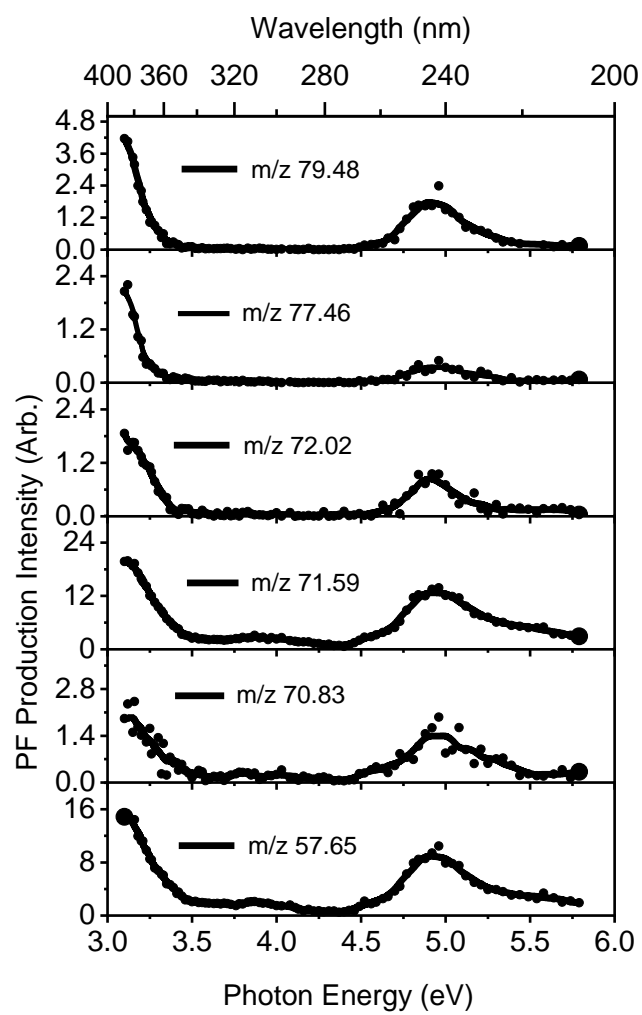

**Figure S4:** Photofragment production spectra of the minor fragments ( $m/z$  79.48, 77.46, 72.02, 71.59, 70.83 and 57.65) of gas-phase  $[\text{OMC}+\text{H}]^+$ . The solid line is a five-point adjacent average of the data points.

TOC:

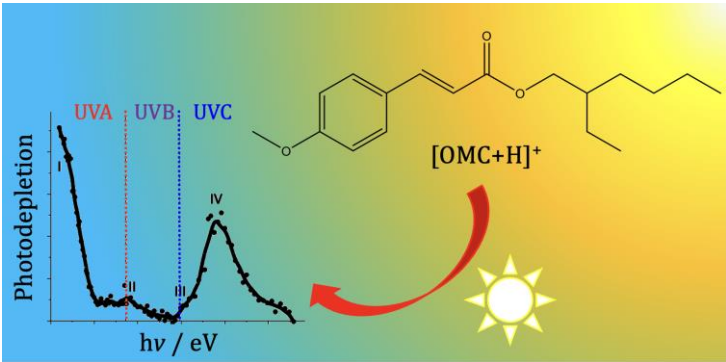

Supplement: s1 [file s1]
